# Supplementary material
Source: PubMed Central journal article supplement (PMC9036861)

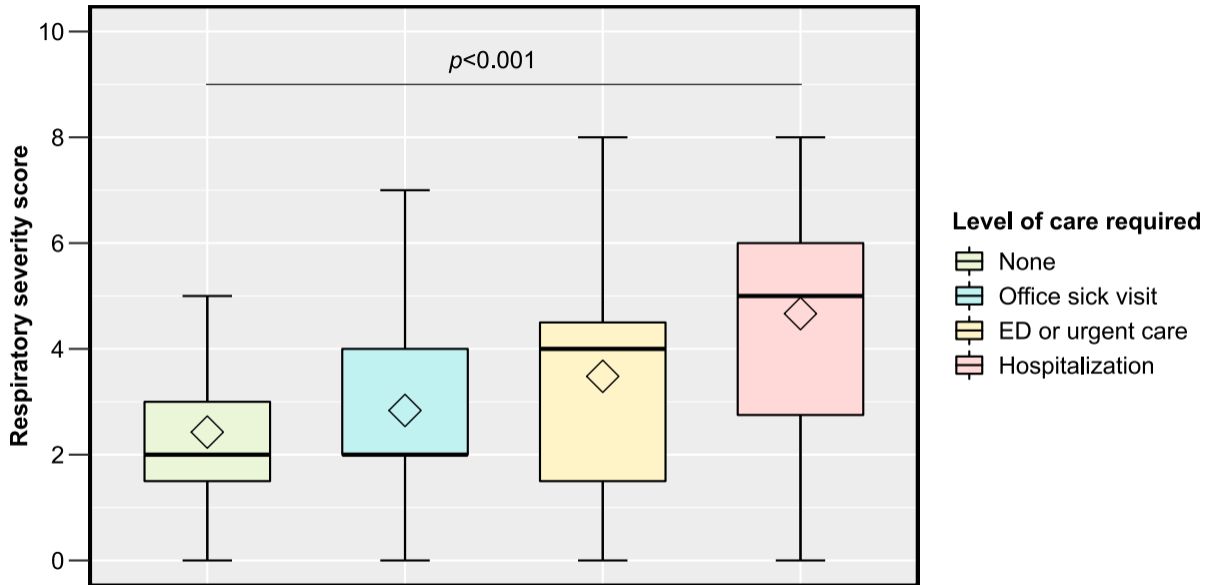

Supplement: NIHMS1794770-supplement-1.pdf [file NIHMS1794770-supplement-1.pdf]

**A** $\beta=0.005$  (95%CI=-0.004 to 0.02),  $p=0.6$ 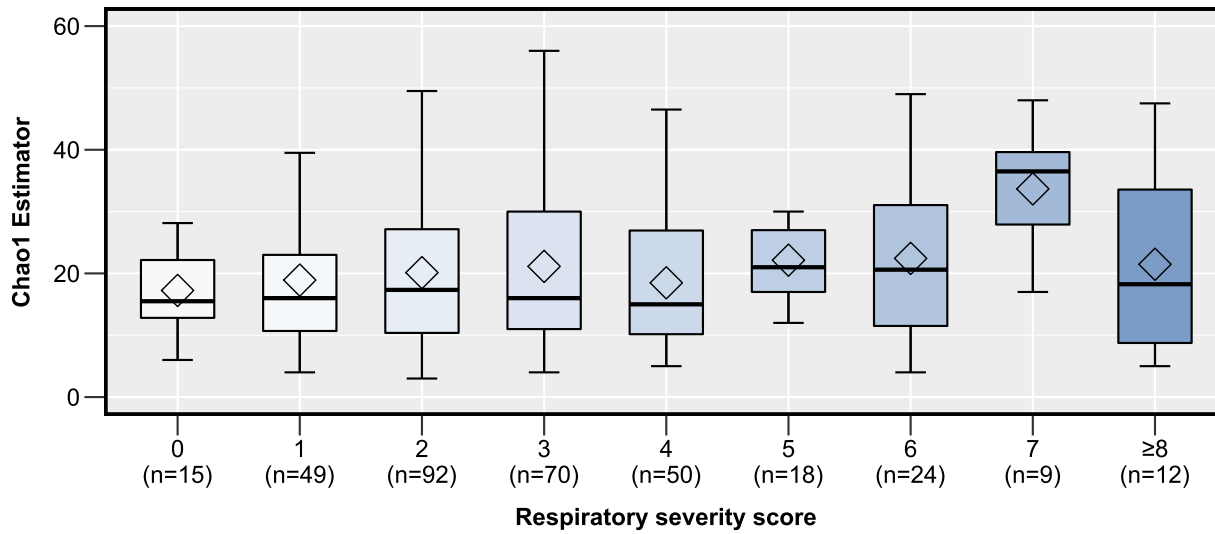**B**OR=1.00 (95%CI=0.99 to 1.01),  $p=0.7$ 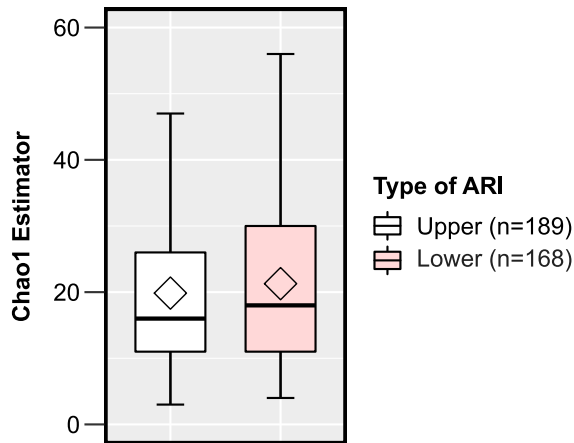**C** $\beta=-0.001$  (95%CI=-0.004 to 0.003),  $p=0.7$ 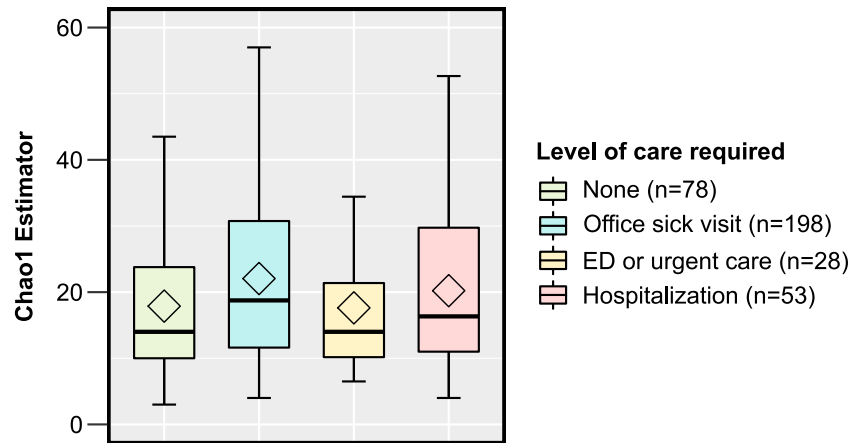**D** $\beta=0.01$  (95%CI=-0.01 to 0.02),  $p=0.5$ 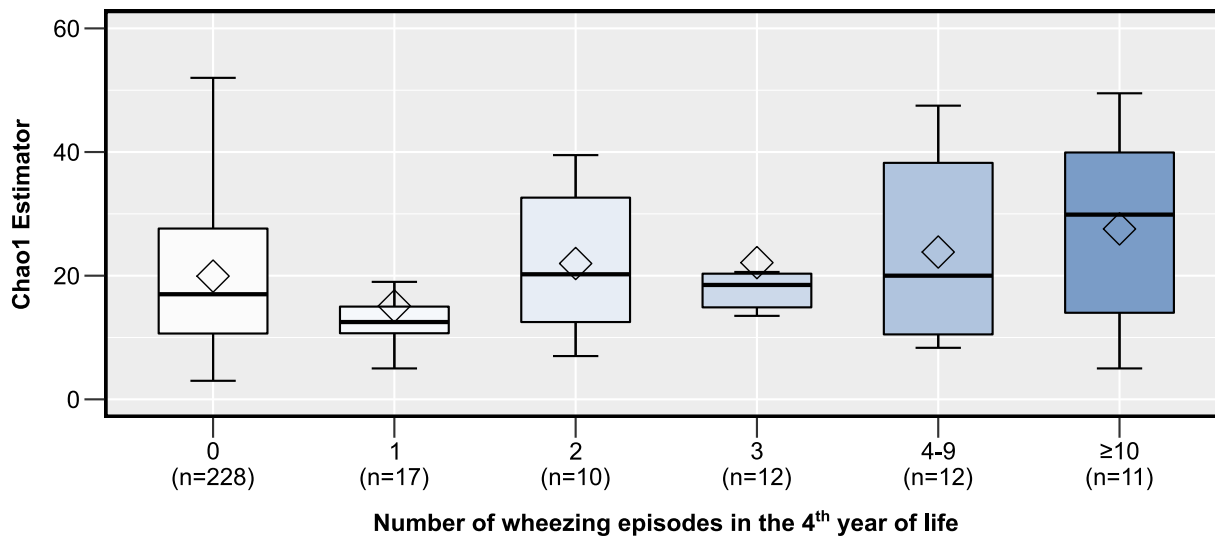

Supplement: NIHMS1794770-supplement-2.pdf [file NIHMS1794770-supplement-2.pdf]

**A** $\beta=0.15$  (95%CI=0.04 to 0.25),  $p=0.01$ 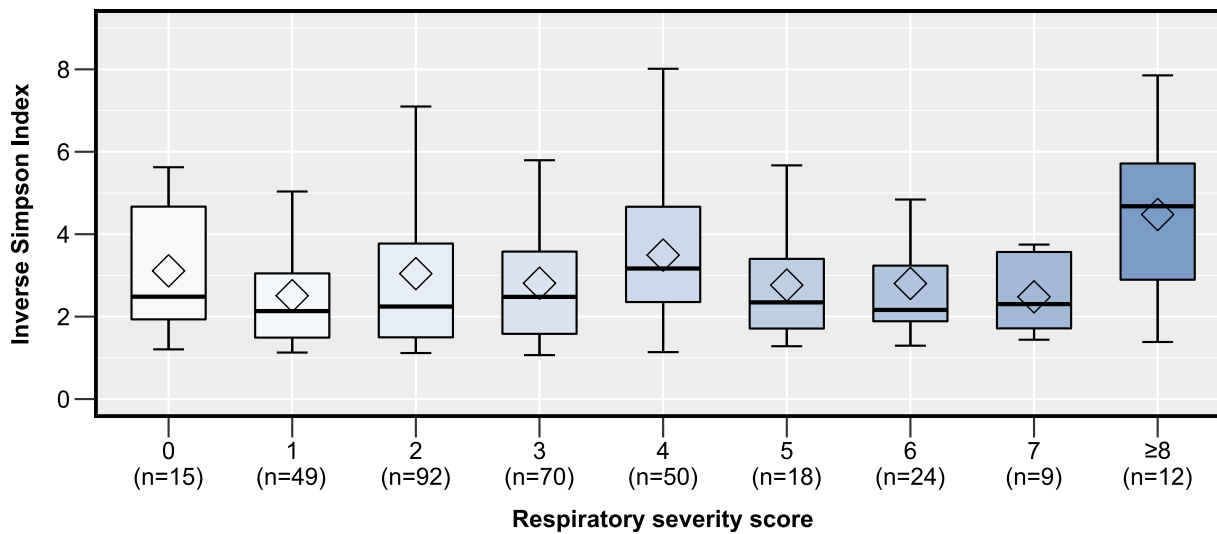**B**OR=1.18 (95%CI=1.05 to 1.34),  $p=0.01$ 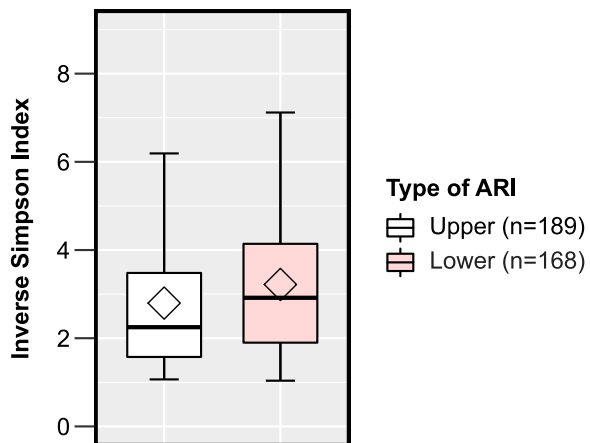**C** $\beta=0.03$  (95%CI=-0.02 to 0.07),  $p=0.3$ 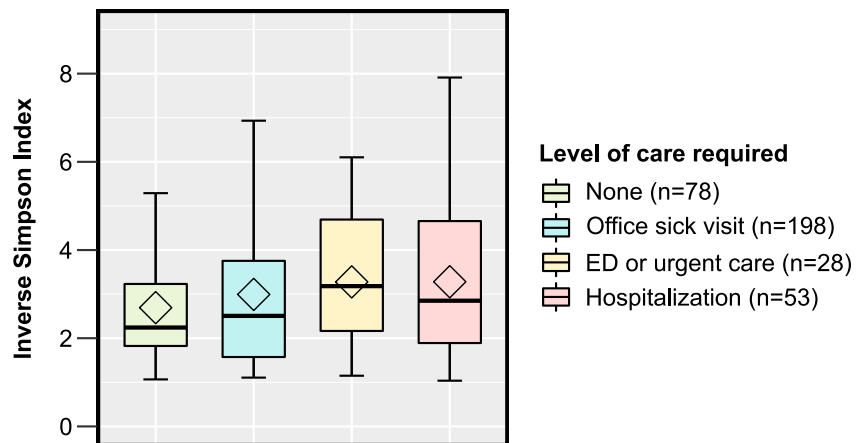**D** $\beta=0.31$  (95%CI=0.15 to 0.47),  $p<0.001$ 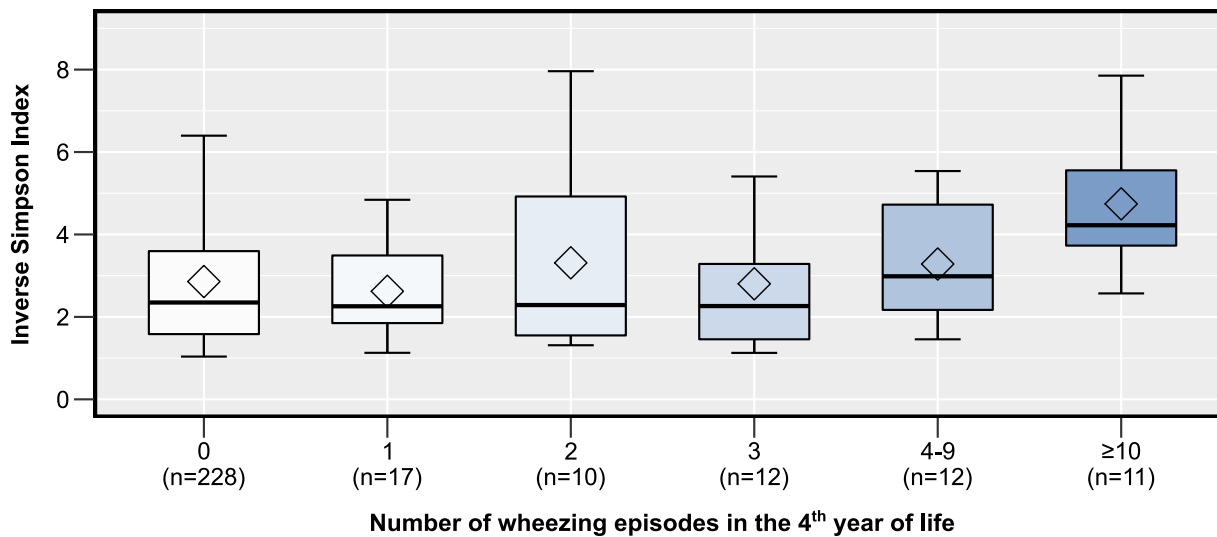

Supplement: NIHMS1794770-supplement-3.pdf [file NIHMS1794770-supplement-3.pdf]

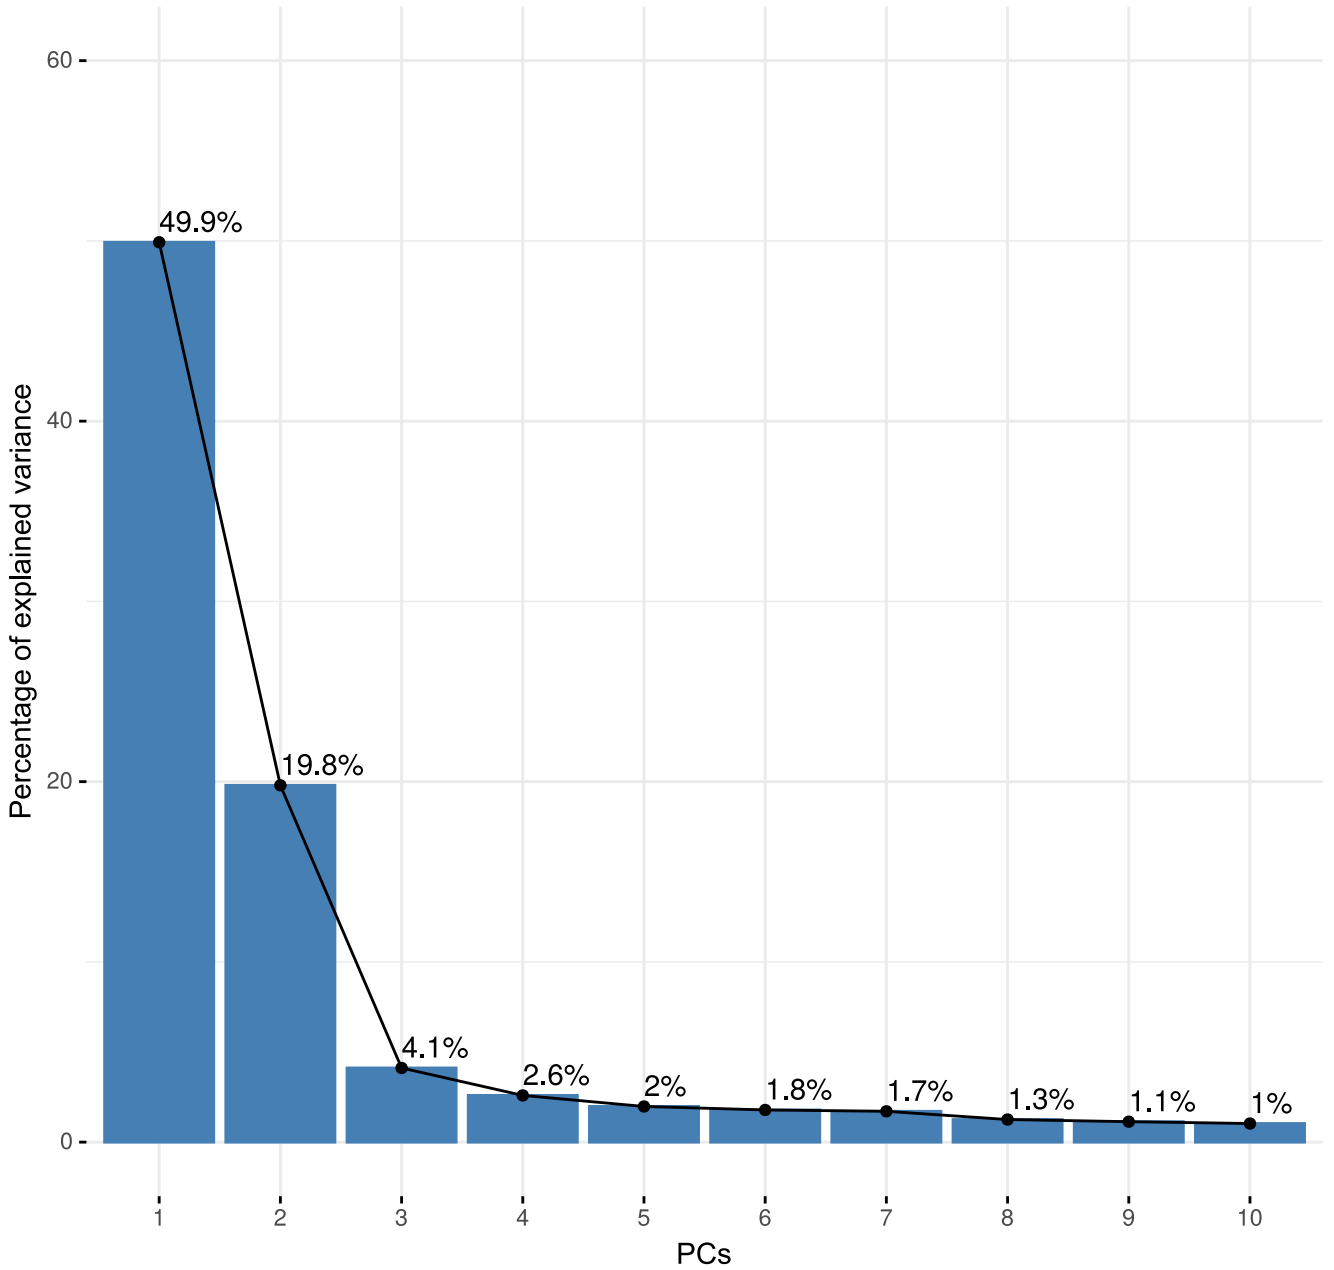

Supplement: NIHMS1794770-supplement-4.pdf [file NIHMS1794770-supplement-4.pdf]

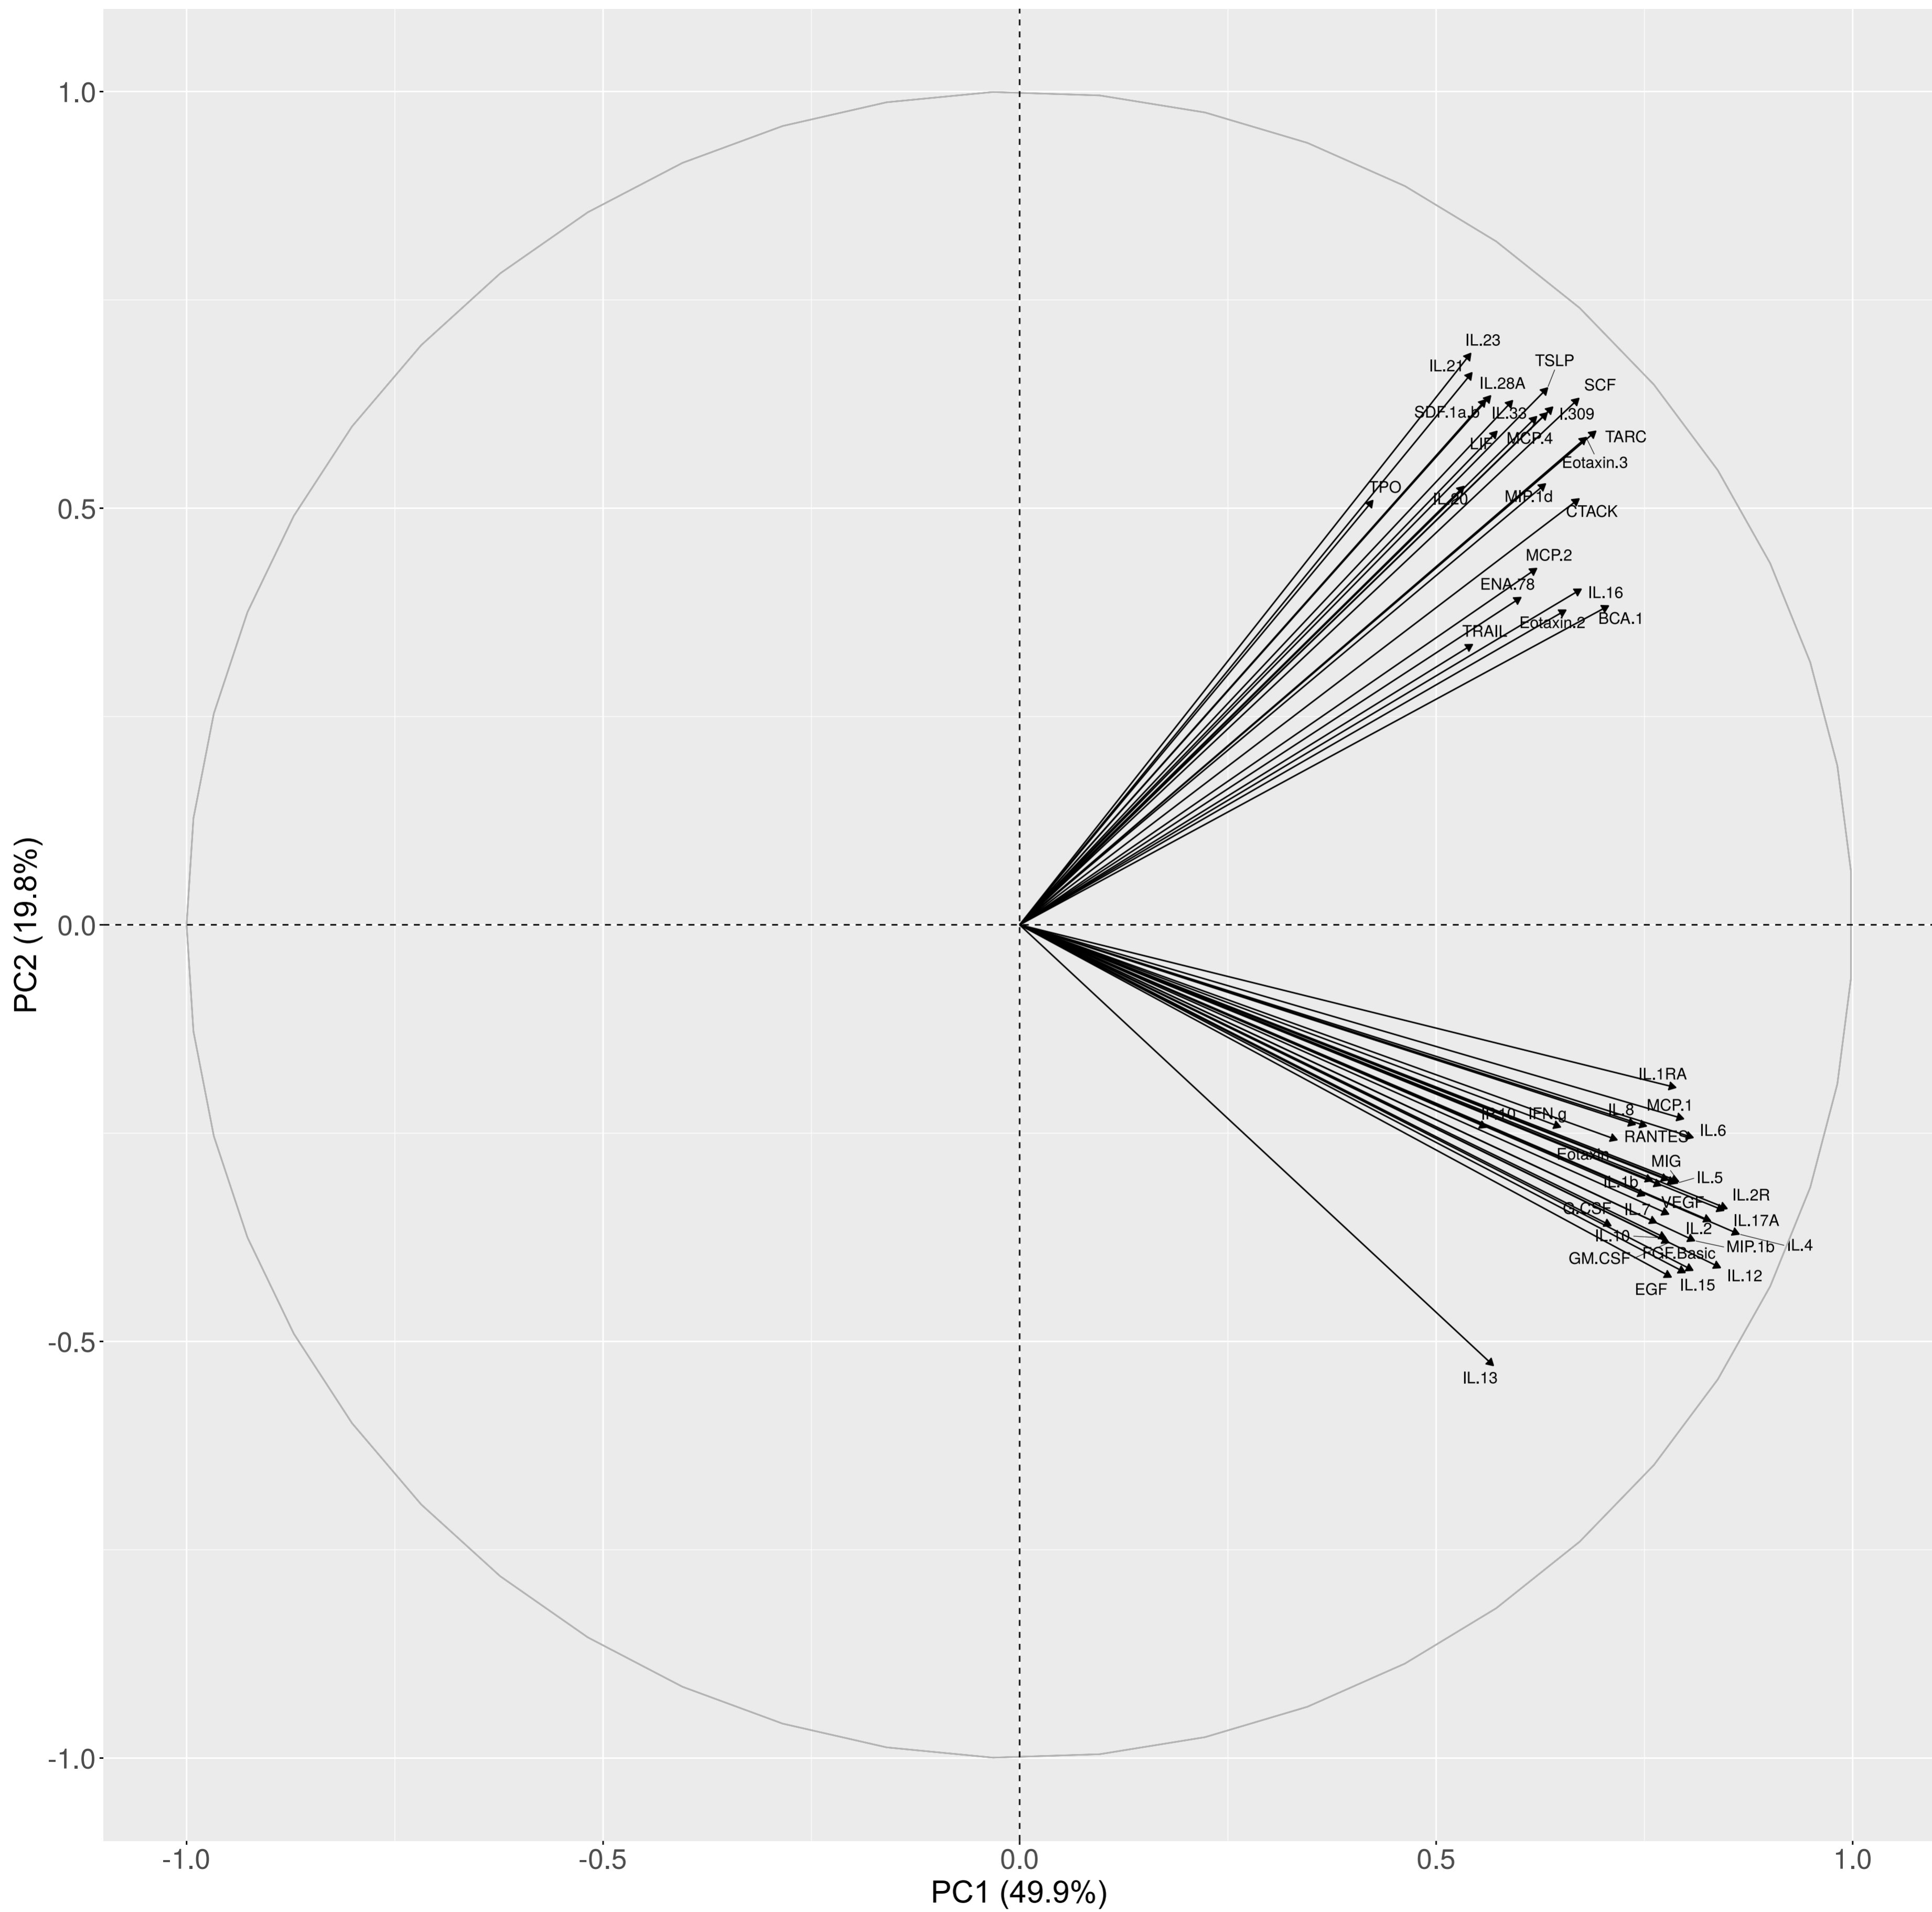

Supplement: NIHMS1794770-supplement-5.pdf [file NIHMS1794770-supplement-5.pdf]

**A**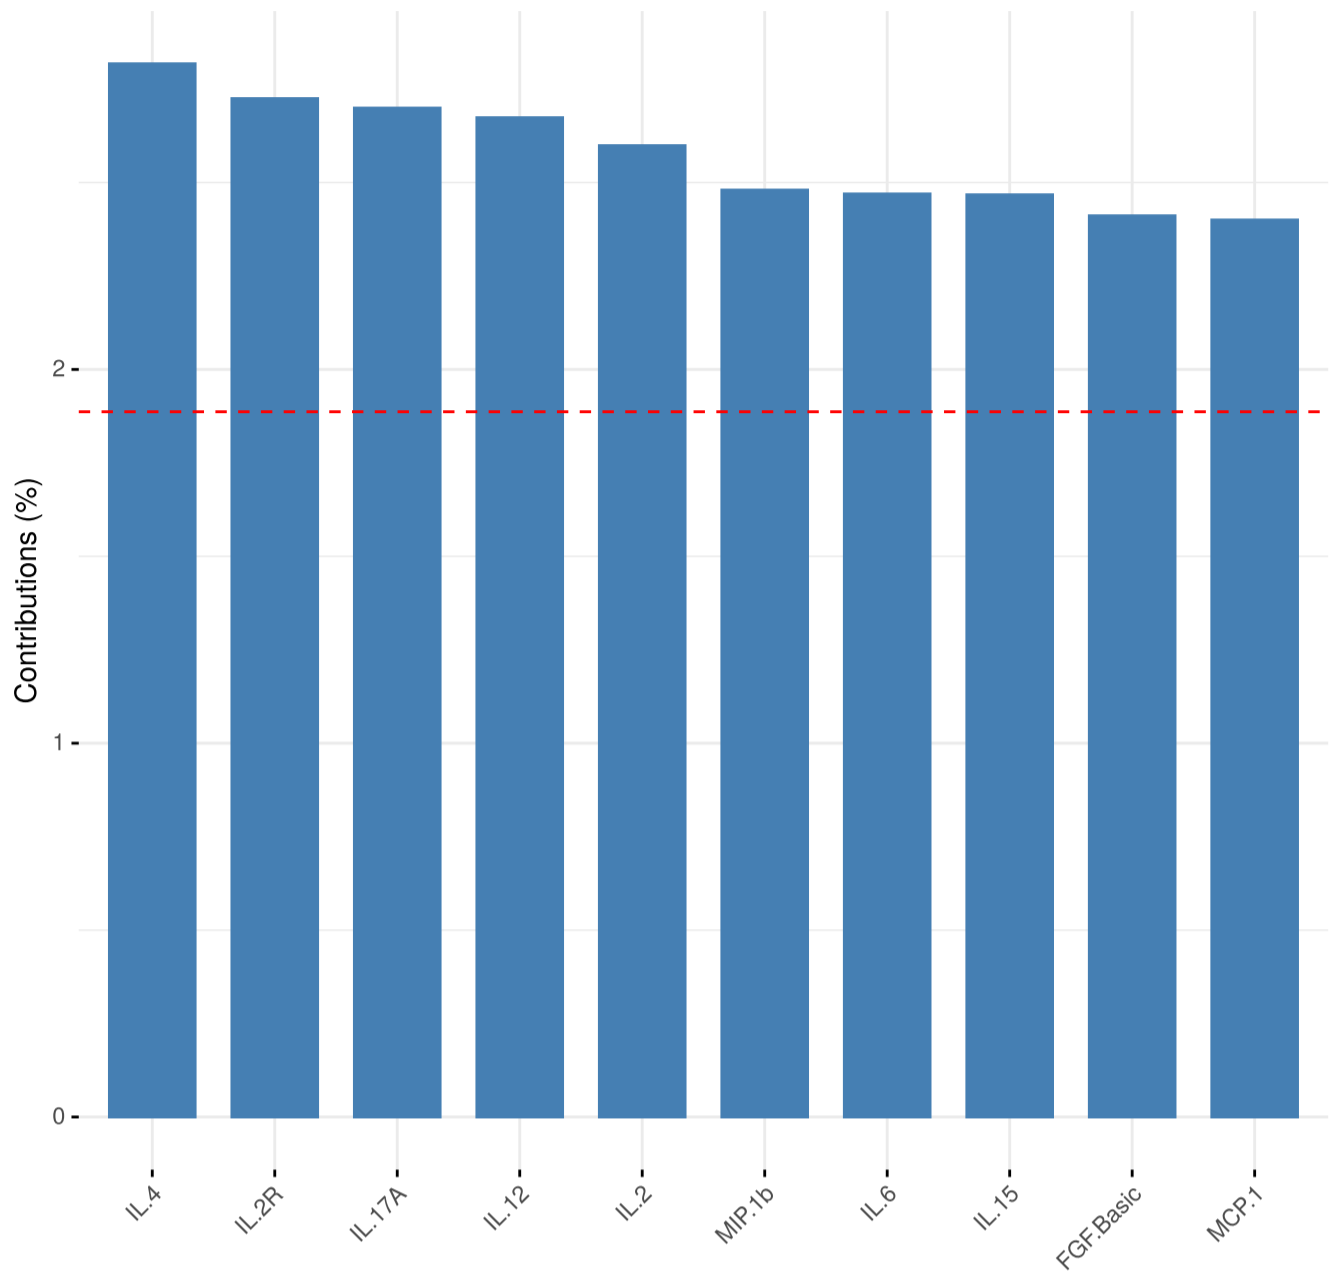**B**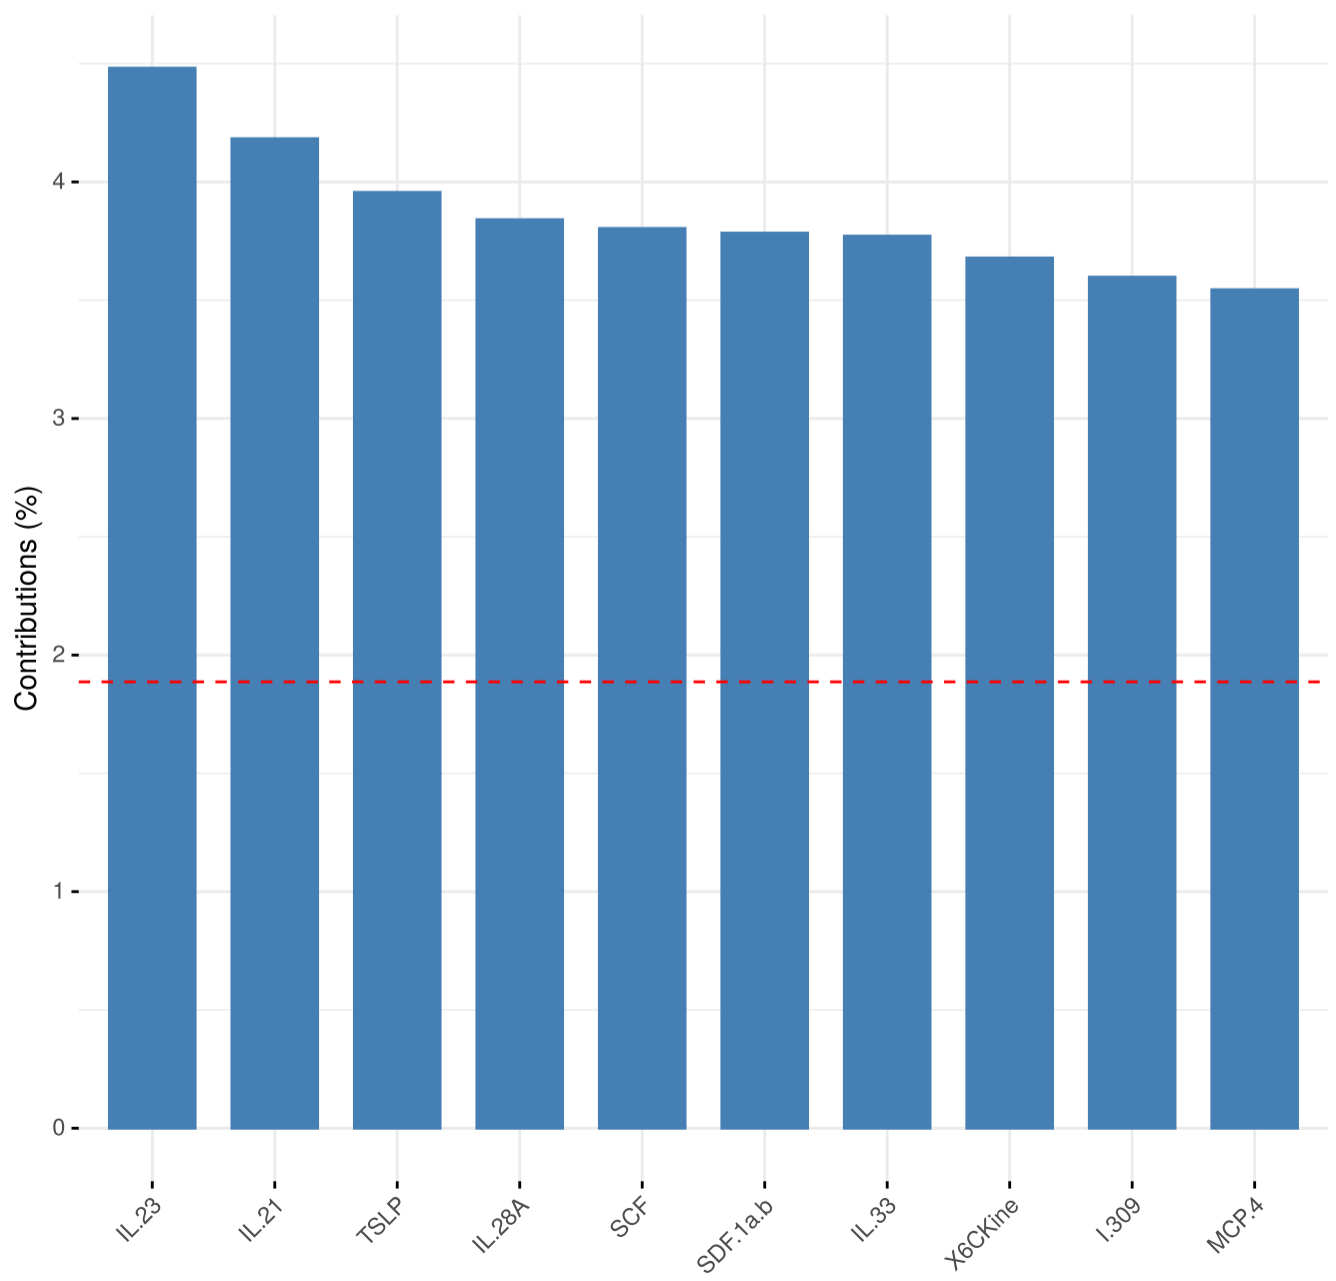

Supplement: NIHMS1794770-supplement-6.pdf [file NIHMS1794770-supplement-6.pdf]
